# Supplementary material for: Translational diffusion of components in concentrated LiTFSI solutions in acetonitrile according to multinuclear pulse NMR data
Source: Research Square preprint supplement (doi:10.21203/rs.3.rs-6959449/v1), 2025-07-02
Supplement: Supplementary file 1 [file 11db93f2d142d03ff812fd67.docx]

SUPPLEMENTARY INFORMATION

Translational diffusion of components in concentrated LiTFSI solutions in acetonitrile according to multinuclear pulse NMR data

Kirill A. Mukhin1, Vladimir V. Matveev2*, and Vladimir I. Chizhik2

1 Department of General and Inorganic Chemistry, Chemistry Institute, Saint Petersburg State University, St. Petersburg, Russia

2Department of Nuclear Physics Research Methods, Saint Petersburg State University, St. Petersburg, Russia

*Corresponding author: [v.matveev@spbu.ru](mailto:v.matveev@spbu.ru)

Figure S1. The temperature dependences of diffusion coefficients *D* for all prepared samples 1 - 10 mol LiTFSI /kg ACN (1H nuclei of solvent molecules, 7Li and 19F of salt ions).

Figure S2. Temperature dependences of diffusion coefficients *D* for 1*m* LiTFSI sample with low (red) and standard (purple) NMR tube filling.

Figure S3. The dependences of 1/on the concentration of LiTFSI for the different nuclei (1H, 7Li and 19F).
